## SYSTEMATIC REVIEWS

# Diabetes mellitus and risk of falls in older adults: a systematic review and meta-analysis

YU YANG, XINHUA HU, QIANG ZHANG, RUI ZOU

Department of Vascular and Thyroid Surgery, The First Affiliated Hospital, China Medical University, Shenyang 110001, PR China

Address correspondence to: Y. Yang, Department of Vascular and Thyroid Surgery, The First Affiliated Hospital, China Medical University, No. 155 Nanjing Street, Heping District, Shenyang 110001, PR China. Tel: + 86-024-83283288; Fax: +86-024-83283288. Email: [yangyushy@sohu.com](mailto:yangyushy@sohu.com)

## Abstract

**Background:** intensive or very loose glycemic control may contribute to the risk of falls in diabetic patients. However, studies on diabetes mellitus and the risk of falls have yielded conflicting results. Our objective was to investigate the effect of diabetes mellitus on the risk of falls in older adults by conducting a systematic review and meta-analysis.

**Methods:** the PubMed and Embase databases were searched for relevant studies published until November 2015. Only prospective cohort studies reporting at least age-adjusted risk estimate of falls compared diabetic to non-diabetic individuals were selected. Diabetes mellitus was ascertained by a combination of medical history and laboratory tests or use of anti-diabetic drugs.

**Results:** a total of six studies involving 14,685 participants were identified. The number of falls in diabetic and non-diabetic individuals was 423 of 1,692 (25.0%) and 2,368 of 13,011 (18.2%), respectively. Diabetes mellitus was associated with an increased risk of falls (risk ratio [RR] = 1.64; 95% confidence intervals [CI] 1.27–2.11) in a random-effects model. Subgroup analyses showed that the risk of falls seemed more pronounced among both gender groups (RR = 1.81; 95% CI 1.19–2.76) than among women (RR = 1.52; 95% CI 1.04–2.21). Diabetes increased 94% (RR = 1.94; 95% CI 1.42–2.63) and 27% (RR = 1.27; 95% CI 1.06–1.52) risk of falls in insulin-treated and no-insulin-treated patients, respectively.

**Conclusions:** this meta-analysis reveals that older adults with diabetes mellitus are associated with greater risk of falls, and this association is more pronounced in insulin-treated patients.

**Keywords:** *diabetes mellitus, risk factors, falls, meta-analysis, older people, systematic review*

## Introduction

Falls is a leading cause of injury in older population [1] and affect one-third of adults aged 65 and older per year in the USA [2]. Falls is associated with fracture risk and cause of hospital admission for trauma. Recurrent falls may significantly reduce the social and physical activities and quality of life. Therefore, identification of modifiable risk factors is of urgent need.

Diabetes mellitus is a global public health burden [3]. Diabetes is estimated to affect at 8.3% of adulthood, and this number will increase by 55% over the next two decades [4]. Falls is a major concern for elderly adults with diabetes mellitus [5, 6]. The annual incidence of falls in elderly diabetic individuals was up to 39% [7]. Approximately 30.6% of individuals with diabetes and 19.4% of individuals

without diabetes experienced recurrent falls in the Longitudinal Ageing Study [8]. Declines in sensory function caused by neuropathy or retinopathy may lead to increased risk of falls in diabetic persons [9]. Intensive glycemic control associated with hypoglycemia may be another possible reason for falls [10, 11].

Studies on the association between diabetes mellitus and the risk of falls in older people have yielded conflicting results [8, 12–17]. These inconsistent findings may correlate to the presence of diabetic complications, long duration of disease, gender or age difference or the study design. However, no previous a systematic review and meta-analysis has evaluated the association between diabetes mellitus and the risk of falls in older people.

Here, we conducted a comprehensive systematic review and meta-analysis of prospective observational studies to

investigate whether diabetes was an independent risk factor for falls in community-dwelling individuals aged 60 and over.

## Methods

### Search strategy

This meta-analysis was conducted in accordance with the checklist of the Meta-Analysis of Observational Studies in Epidemiology [18]. We searched the PubMed and Embase databases from their inception to November 2015 using a combination of the following medical subject headings terms: (falls OR falling) AND (diabetes mellitus OR diabetic) AND (follow-up OR prospective OR longitudinal OR cohort). The study protocol was present in Supplementary data, Figure S1, available in *Age and Ageing* online. In addition, the reference lists of included studies and relevant reviews were manually screened to identify additional eligible articles. Two reviewers (Y. Yang and Q. Zhang) independently made literature search.

### Study selection

Articles were eligible if: (i) prospective cohort studies investigated the association between diabetes and the risk of falls; (ii) participants were aged 60 and over; (iii) diabetes mellitus was ascertained by a combination of medical history and laboratory tests or use of anti-diabetic agents and (iv) studies provided at least age-adjusted risk estimates of falls compared diabetes to non-diabetes individuals. A falls was defined as ‘an unintentional change in position resulting in coming to rest at a lower level or on the ground’ [19]. Participants were grouped as fallers if they experienced at least one fall during the follow-up period. We excluded articles of retrospective, case-control or cross-sectional design. In addition, we also excluded studies that did not provide unadjusted risk estimate.

### Data extraction and quality assessment

Two reviewers (Y. Yang and Q. Zhang) independently carried out the literature search, study selection and data extraction process. The following data were extracted from the included studies: 1st author's name, year of publication, study design, origin of study, sample size, participant information (mean age or age range, percentage of females), number of participants, definition of diabetes and falls, most fully adjusted hazard ratio (HR) or odds ratio (OR) together with 95% confidence intervals (CI), follow-up duration and adjustments for covariates. Two reviewers (Y. Yang and Q. Zhang) independently assessed the quality of included studies using the Newcastle Ottawa Scale (NOS) for the non-randomised observational study [20]. The overall scores for methodological quality range from zero to nine.

### Statistical analysis

As for variation in the report and adjustment for confounding factors in each study, we only selected the most fully adjusted risk estimate. HR and OR were assumed to approximate the same relative risk and are collectively described as the risk ratio (RR) in this meta-analysis. If the studies provided the separate risk estimate by the subgroup, we pooled these separate risk estimates in this study. In order to measure heterogeneity, the Cochran  $Q$  test and  $I^2$  statistic were used, with  $I^2$  value  $>50\%$  or  $P$ -value in Cochran  $Q$  test less than 0.10 indicated statistically significant heterogeneity [21]. A random-effect model was applied with statistically significant heterogeneity across the studies; otherwise, we selected a fixed-effect model. Subgroup analyses were conducted by the geographic region (Europe vs. USA), gender (female vs. both gender), insulin treated (yes vs. not), follow-up duration ( $>3$  years vs.  $\leq 3$  years), adjustment for body weight (yes vs. not), risk estimate (HR vs. OR) and number of diabetic participants ( $\geq 500$  vs.  $<500$ ). Sensitivity analyses were performed by omitting a single study in each turn to test the robustness of our results. Statistical tests for publication bias were conducted if the number of the included studies was less than the recommended arbitrary minimum number of 10 [22]. All analyses were done using STATA version 12.0 statistical software (Stata, College Station, TX).

## Results

### Literature search

Based on the initial search strategies, 685 potentially relevant citations were retrieved. Among these studies, 679 citations were removed mainly because they did not report the outcome interesting or not provide adjusted risk estimate. Finally, six prospective observational studies [8, 12–15, 17] met the inclusion criteria. The study selection process is presented in Figure 1.

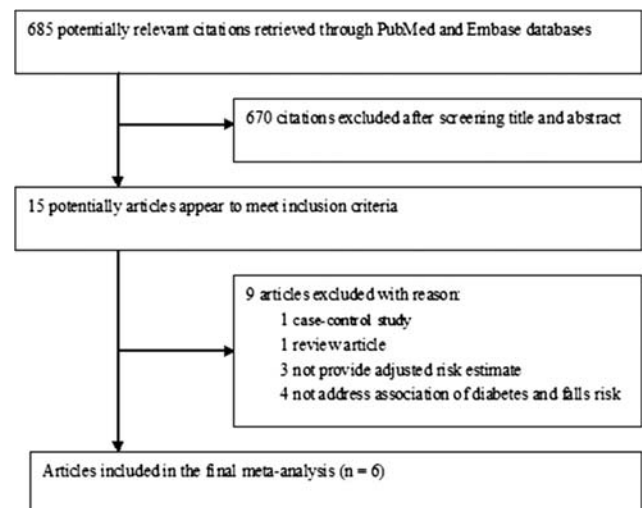

Figure 1. Flow chart of studies selection process.

## Study characteristics

All the included studies were prospective design and published from 2002 to 13. The sample size of the individual studies varied from 139 to 9,249. A total of 14,685 participants were identified and analysed. The follow-up duration ranged from 299 days to 10.1 years. Two studies were [13, 17] consisted of female participants, whereas the other four studies [8, 12, 14, 15] included both genders. Three studies [13, 15, 17] reported the risk estimates by insulin treated or not. Diabetes was ascertained by self-report of a physician's diagnosis, anti-diabetic medication use or laboratory findings. Falls was monitored by the postcard, telephone or review of the daily report. The baseline characteristics of the included studies are listed in Table 1. The overall NOS stars of the included studies ranged from 6 to 8 (Supplementary Table S1, available in *Age and Ageing* online).

## Association between diabetes mellitus and risk of falls

Six studies involving 1,691 diabetic patients reported the risk of any falls. The number of falls in diabetic and non-diabetic participants was 423 of 1,692 (25.0%) and 2,368 of 13,011 (18.2%), respectively. As shown in Figure 2, older persons with diabetes are associated with an increased risk of falls (RR 1.64; 95% CI 1.27–2.11) compared with healthy controls. A random-effects model was selected because the significant heterogeneity ( $I^2 = 60.1\%$ ;  $P = 0.020$ ) was observed. Subgroup analyses showed that the excessive risk of falls was consistently observed in each subgroup (Table 2 and supplementary figures are available in *Age and Ageing* online). Particularly, insulin-treated diabetic patients were associated with a greater risk of falls (RR 1.94; 95% CI 1.42–2.63) than those without insulin treatment. The number of falls in insulin-treated and without insulin-treated patients was 82 of 255 (32.2%) and 259 of 1,229 (21.1%), respectively. The risk of falls appeared to be lower in women than both gender subgroups.

## Sensitivity analyses

Sensitivity analyses indicated that the pooled RR ranged from 1.46 to 1.75 and low 95% CI ranged from 1.20 to 1.28 when any single study was removed. Moreover, the pooled RR of falls was 1.49 (95% CI 1.28–1.73) when we changed to a fixed-effect model. When we removed two studies that only investigated the recurrent falls [8] and injurious falls [15], the pooled RR of any falls was 1.88 (95% CI 1.27–2.78) in a random-effects model.

## Discussion

To the best of our knowledge, this is the 1st meta-analysis to investigate the relationship between diabetes mellitus and the risk of falls in older adults. Our meta-analysis revealed that (i) older adults with diabetes mellitus were associated

with a 64% greater risk of falls; (ii) diabetes increased 94 and 27% risk of falls in insulin-treated and without insulin-treated patients, respectively. This systematic review and meta-analysis reinforced the effect of diabetes as an independent risk factor for falls in older adults.

Falls is one of the greatest health challenges, particularly in diabetic adults [23]. The consequences of falls, such as fractures, poorer rehabilitation and increased number of falls were said to be more severe in the elderly with diabetes [24]. Subgroup analysis revealed that diabetes increased by 52 and 81% the risk of falls in women and both genders. Men with diabetes had a higher frequency of falls has been reported in a previous study [25]. The pronounced risk of falls in men may be attributed to the effects of body weight or body mass index [26]. However, gender-specific effect of diabetes on falls risk needs to be further investigated. Subgroup analysis revealed that studies involving over 500 cases of diabetic individuals had a lower risk estimate than those sample sizes less than 500 cases (RR 1.54 vs. 1.80). Moreover, the effects of diabetes on falls risk were not affected by the duration of follow-up, geographical regions or publication year.

An important issue was the association of falls and glycaemic control in diabetic persons. Studies on glycaemic control and risk of falls have yielded conflicting results. Tighter glycaemic control ( $HbA1c \leq 7$ ) was associated with greater risk of falls in a retrospective study [27], but other study did not find such association [28]. Another study showed that only the low-impact falls were significantly increased in patients receiving insulin therapy [29]. The Health, Aging and Body Composition cohort showed that achieving lower HbA1c levels with oral hypoglycaemia agents did not increase more frequent falls, but,  $HbA1c \leq 6\%$  among those insulin-treated patients increased the risk of falls [30]. Irrespective of type of diabetes mellitus, insulin treatment may represent intensive glycaemic control of the diseases. In this meta-analysis, diabetic persons who received insulin treatment had a 94% greater risk of falls, while the risk was lower (27%) in those without insulin-treated diabetic individuals. Hypoglycaemia episodes induced by the intensive insulin therapy at least in part explain the excess risk of falls associated with diabetes. In addition, using multiple drugs may increase the risk of falls owing to the occurrence of drowsiness, muscle weakness, balance change, vertigo and hypotension [31]. Among 46,946 type 2 diabetic persons in the Kaiser Permanente Northern California Diabetes Registry, the prescription of four or more medications was associated with greater risk of falls [32]. On the contrary, inadequate glycaemic control and conditions associated with peripheral neuropathy and retinopathy also significantly increased risk of falls in diabetic persons. The effect of glycaemic control on falls risk needs to further investigated in more well-designed studies.

Mechanisms underlying diabetes and falls risk are not well elucidated. People with diabetes developed peripheral neuropathy and retinopathy, vestibular dysfunction, cognitive impairment, musculoskeletal/neuromuscular lesion of

Table 1. Baseline characteristics of the included studies

| Study/year                                    | Region          | Design                                    | Subject (% women) | Age/range or mean $\pm$ SD | Diagnosis of DB (number of DB)                            | Ascertainment of falls                                    | Falls number (%) (DB vs. control)                                           | HR/OR (95% CI)                                                                                         | Follow-up duration | Adjustment for covariates                                                                                                                                                                                                                                                                                                |
|-----------------------------------------------|-----------------|-------------------------------------------|-------------------|----------------------------|-----------------------------------------------------------|-----------------------------------------------------------|-----------------------------------------------------------------------------|--------------------------------------------------------------------------------------------------------|--------------------|--------------------------------------------------------------------------------------------------------------------------------------------------------------------------------------------------------------------------------------------------------------------------------------------------------------------------|
| Schwartz <i>et al.</i> (2002) [17]            | USA             | Prospective cohort study                  | 9,249 (100%)      | $\geq 67$ years            | Self-reported (629)                                       | Any falls by monitored every 4 months by postcard         | 171 (27.2%) vs. 1465 (17%); 35/99 in insulin and 136/530 in without insulin | 1.18 (0.87–1.60) no insulin treated; 2.76 (1.52–5.01) insulin treated                                  | 7.2 years          | Age, tandem walk score, tandem stand, loss of pressure sensitivity, history of CHD, history of stroke, arthritis or fainting, grip strength, positive GDS, near depth perception and sleeplessness or anxiety medications                                                                                                |
| Maurer <i>et al.</i> (2005) [12]              | USA             | Prospective cohort study                  | 139 (84%)         | $88 \pm 7$ years           | Prescription of medications used to treat DB (18)         | Any falls by interview or from their guardian             | 14 (78%) vs. 35 (30%)                                                       | 4.03 (1.96–8.28) total patients                                                                        | 299 days           | Berg scale < 45, hypertension, no. of medications, angiotensin-converting enzyme inhibitors                                                                                                                                                                                                                              |
| Volpato <i>et al.</i> (2005) [13]             | Norway          | Prospective population-based cohort study | 878 (100%)        | $\geq 65$ years            | Algorithm used for diabetes ascertainment (136)           | Any falls by interview every 6 months                     | 99 (72.8%) vs. 417 (63.5%); 31/39 in insulin and 68/97 in without insulin   | 1.38 (1.04–1.81) total patients; 1.35 (0.99–1.84) no insulin treated; 1.45 (0.92–2.27) insulin treated | 3 years            | Age, race, education, smoking, overweight, obesity, hypertension, antihypertensive drugs, stroke, PAD, peripheral nerve dysfunction, knee osteoarthritis pain, visual impairment, MMSE, fall in per year before interview, ADLs, physical performance and knee strength                                                  |
| Pijpers <i>et al.</i> (2012) [8]              | The Netherlands | Population-based cohort study             | 1,145 (49.8%)     | $\geq 65$ years            | Self-reported and use of glucose-lowering medication (85) | Recurrent falls monitored every 4 months by calendar page | 26 (30.6%) vs. 206 (19.4%)                                                  | 1.30 (0.79–2.11) total patients                                                                        | 3 years            | Age, sex, education, urbanisation, dogs and cats in household, special adjustments in house, BMI, alcohol, smoking, medication, physical impairments, general health, pain score, self-perceived health, physical activity, grip strength, functional limitations in ADLs, physical performance and MMSE score $\leq 23$ |
| Yau <i>et al.</i> (2013) [15]                 | USA             | Prospective longitudinal study            | 3,075 (51.5%)     | 70–79 years                | Glucose measurements as well as self-report (719)         | Injurious falls requiring hospitalisation                 | 71 (21.8%) vs. 223 (9.46%); 16/117 in insulin and 55/602 in without insulin | 1.41 (1.05–1.88) total patients; 1.30 (0.95–1.78) no insulin treated; 2.24 (1.24–4.03) insulin treated | 10.1 years         | Age, sex, race, study site, education, BMI, fainting in the past year, standing balance score, cystatin C and number of prescription medications                                                                                                                                                                         |
| Roman de Mettelinge <i>et al.</i> (2013) [14] | Belgium         | Prospective cohort study                  | 199 (63.3%)       | $76.9 \pm 9.4$ years       | General practitioner or medical specialist (95)           | Any falls by monitored by monthly fall calendars          | 42 (40.8%) vs. 22 (23.4%)                                                   | 2.03 (1.06–3.88) total patients                                                                        | 12 months          | Age, BMI, community-dwelling, walking aids, number of medications, previous falls, grip strength, cognitive, gait and smoking                                                                                                                                                                                            |

ADLs, activities of daily living; BMI, body mass index; CHD, coronary heart disease; DB, diabetes; GDS, Geriatric Depression Score; HR, hazard ratio; MMSE, Mini-Mental Scale Examination; OR, odds ratio; PAD, peripheral arterial disease.



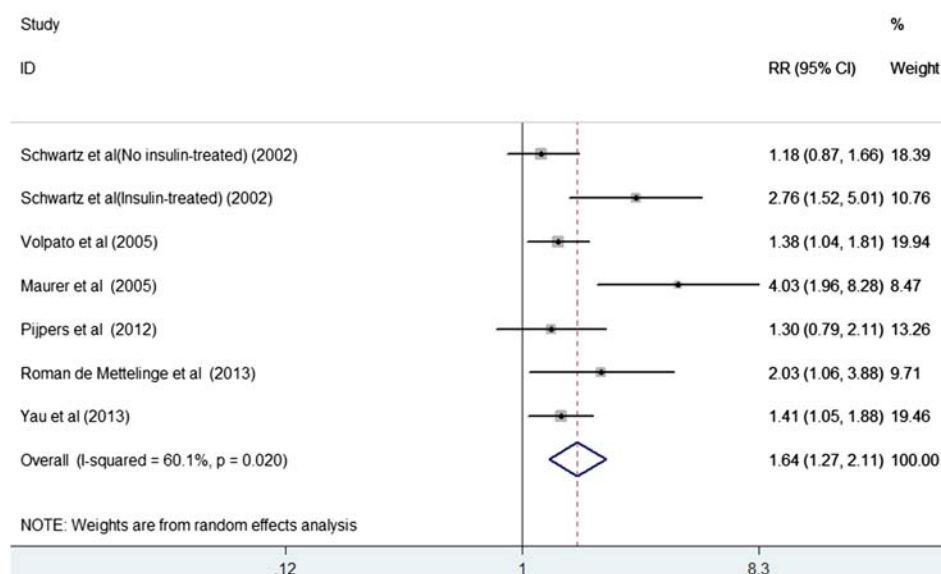

**Figure 2.** Forest plots showing RR and 95% CI of falls comparing the diabetic individuals to non-diabetes in a random-effect model.

**Table 2.** Subgroup analyses of diabetes and risk of falls

| Subgroup             | No. of studies | Pooled RR | 95% confidence interval | Heterogeneity between studies |
|----------------------|----------------|-----------|-------------------------|-------------------------------|
| Region               |                |           |                         |                               |
| Europe               | 3              | 1.43      | 1.14–1.79               | $P = 0.515$ ; $I^2 = 0.0\%$   |
| USA                  | 3              | 1.89      | 1.19–2.99               | $P = 0.004$ ; $I^2 = 77.8\%$  |
| Follow-up period     |                |           |                         |                               |
| >3 years             | 2              | 1.54      | 1.05–2.25               | $P = 0.049$ ; $I^2 = 66.9\%$  |
| ≤3 years             | 4              | 1.80      | 1.17–2.75               | $P = 0.035$ ; $I^2 = 65.0\%$  |
| No. of diabetes      |                |           |                         |                               |
| <500                 | 4              | 1.80      | 1.17–2.75               | $P = 0.035$ ; $I^2 = 65.0\%$  |
| ≥500                 | 2              | 1.54      | 1.05–2.25               | $P = 0.049$ ; $I^2 = 66.9\%$  |
| Publication year     |                |           |                         |                               |
| <2010                | 4              | 1.87      | 1.18–2.96               | $P = 0.003$ ; $I^2 = 78.1\%$  |
| >2010                | 2              | 1.45      | 1.15–1.83               | $P = 0.533$ ; $I^2 = 0.0\%$   |
| Risk estimate        |                |           |                         |                               |
| HR                   | 3              | 1.59      | 1.14–2.20               | $P = 0.066$ ; $I^2 = 58.3\%$  |
| OR                   | 3              | 1.79      | 1.04–3.09               | $P = 0.022$ ; $I^2 = 73.9\%$  |
| Gender               |                |           |                         |                               |
| Women                | 2              | 1.52      | 1.04–2.21               | $P = 0.048$ ; $I^2 = 67.0\%$  |
| Women + men          | 4              | 1.81      | 1.19–2.76               | $P = 0.041$ ; $I^2 = 63.6\%$  |
| Insulin treated      |                |           |                         |                               |
| Yes                  | 3              | 1.94      | 1.42–2.63               | $P = 0.205$ ; $I^2 = 36.9\%$  |
| No                   | 3              | 1.27      | 1.06–1.52               | $P = 0.821$ ; $I^2 = 0.0\%$   |
| Adjusted body weight |                |           |                         |                               |
| Yes                  | 4              | 1.42      | 1.19–1.70               | $P = 0.721$ ; $I^2 = 0.0\%$   |
| No                   | 2              | 2.25      | 1.03–4.92               | $P = 0.002$ ; $I^2 = 84.5\%$  |

RR, risk ratio.

the lower limbs or dizziness and hypoglycaemia events with insulin use [23]. Insulin treatment was associated with excessive risk of falls, possibly owing to more severe disease and/or hypoglycaemia episodes.

This study had several limitations. First, substantial heterogeneity ( $I^2 = 60.1\%$ ) was observed in the overall analysis; differences in severity of diabetes and falls, follow-up duration, gender and adjustment for confounding factors

may partly explain the heterogeneity. Second, diabetes ascertaining by self-report but not through a fasting glucose level may underestimate the number of persons with diabetes. Misclassification of participants might underestimate the effect of diabetes on the risk of falls. Moreover, we did not differentiate between single and recurrent falls in this meta-analysis. Third, residual confounding factors, such as prior fall history, chronic musculoskeletal pain or cognitive status,

could have confounded the findings of this study. Fourth, findings of subgroup analyses should be explained with caution due to the limited number of study available. Fifth, all the included studies were performed in Western countries; generalisation of these findings to other regions should be cautioned. Sixth, we only selected articles that published in peer-reviewed journal and unpublished articles or conference abstracts were not considered in this meta-analysis. Finally, the included studies did not report the risk estimate of falls based on the peripheral neuropathy, retinopathy as well as hypoglycemia induced by intensive glycemic control. Therefore, we cannot distinguish overtreatment or complications as a cause of falls in this meta-analysis.

## Conclusions

This meta-analysis reveals that older adults with diabetes are associated with excessive risk of falls compared with non-diabetes. Moreover, the increased risk appears to be greater in insulin-treated patients. Hypoglycemia induced by intensive glycemic control or peripheral neuropathy and retinopathy induced by the loose glycemic control may increase the risk of falls. Future studies should address the association between glycemic control and the severity of falls.

## Key points

- Conflicting findings have been reported on diabetes and risk of falls.
- Older adults with diabetes mellitus have an excessive risk of falls.
- This association is more pronounced in insulin-treated patients.
- Intensive or loose glycemic control all may increase the risk of falls.
- Effect of glycemic control on falls risk needs to be further studied.

## Supplementary data

Supplementary data mentioned in the text are available to subscribers in *Age and Ageing* online.

## Authors' contributions

Y. Yang and Q. Zhang conducted the literature search and data extraction; R. Zou and XH. Hu performed the statistical analysis; XH. Hu draughted the manuscript; Q. Zhang and R. Zou revised the manuscript; Y. Yang designed the study protocol and analysed the results.

## Conflicts of interest

None.

## Funding

This work was supported by National Nature Science Foundation of China (81070254, 30872527 and 30672048).

## References

1. Tinetti ME. Clinical practice. Preventing falls in elderly persons. *N Engl J Med* 2003; 348: 42–9.
2. Self-reported falls and fall-related injuries among persons aged > or = 65 years—United States, 2006. *MMWR Morb Mortal Wkly Rep*. 2008; 57: 225–9.
3. Corriere M, Rooparinesingh N, Kalyani RR. Epidemiology of diabetes and diabetes complications in the elderly: an emerging public health burden. *Curr Diab Rep* 2013; 13: 805–13.
4. Guariguata L, Whiting DR, Hambleton I, Beagley J, Linnenkamp U, Shaw JE. Global estimates of diabetes prevalence for 2013 and projections for 2035. *Diabet Res Clin Pract* 2014; 103: 137–49.
5. Kim KS, Kim SK, Sung KM, Cho YW, Park SW. Management of type 2 diabetes mellitus in older adults. *Diabet Metab J* 2012; 36: 336–44.
6. Macgilchrist C, Paul L, Ellis BM, Howe TE, Kennon B, Godwin J. Lower-limb risk factors for falls in people with diabetes mellitus. *Diabet Med* 2010; 27: 162–8.
7. Tilling LM, Darawil K, Britton M. Falls as a complication of diabetes mellitus in older people. *J Diabet Complications*. 2006; 20: 158–62.
8. Pijpers E, Ferreira I, de Jongh RT *et al.* Older individuals with diabetes have an increased risk of recurrent falls: analysis of potential mediating factors: the Longitudinal Ageing Study Amsterdam. *Age Ageing* 2012; 41: 358–65.
9. Hewston P, Deshpande N. Fall and balance impairments in older adults with type 2 diabetes: thinking beyond diabetic peripheral neuropathy. *Can J Diabet* 2016; 40: 6–9.
10. Oliveira PP, Fachin SM, Tozatti J, Ferreira MC, Marinheiro LP. Comparative analysis of risk for falls in patients with and without type 2 diabetes mellitus. *Rev Assoc Med Bras* 2012; 58: 234–9.
11. Chiba Y, Kimbara Y, Kadera R *et al.* Risk factors associated with falls in elderly patients with type 2 diabetes. *J Diabet Complications* 2015; 29: 898–902.
12. Maurer MS, Burcham J, Cheng H. Diabetes mellitus is associated with an increased risk of falls in elderly residents of a long-term care facility. *J Gerontol A Biol Sci Med Sci* 2005; 60: 1157–62.
13. Volpato S, Leveille SG, Blaum C, Fried LP, Guralnik JM. Risk factors for falls in older disabled women with diabetes: the women's health and aging study. *J Gerontol A Biol Sci Med Sci* 2005; 60: 1539–45.
14. Roman de Mettelinge T, Cambier D, Calders P, Van Den Noortgate N, Delbaere K. Understanding the relationship between type 2 diabetes mellitus and falls in older adults: a prospective cohort study. *PLoS One* 2013; 8: e67055.
15. Yau RK, Strotmeyer ES, Resnick HE *et al.* Diabetes and risk of hospitalized fall injury among older adults. *Diabet Care* 2013; 36: 3985–91.
16. Herndon JG, Helmick CG, Sattin RW, Stevens JA, DeVito C, Wingo PA. Chronic medical conditions and risk of fall

- injury events at home in older adults. *J Am Geriatr Soc* 1997; 45: 739–43.
17. Schwartz AV, Hillier TA, Sellmeyer DE *et al.* Older women with diabetes have a higher risk of falls: a prospective study. *Diabet Care* 2002; 25: 1749–54.
  18. Stroup DF, Berlin JA, Morton SC *et al.* Meta-analysis of observational studies in epidemiology: a proposal for reporting. Meta-analysis of observational studies in epidemiology (MOOSE) group. *JAMA* 2000; 283: 2008–12.
  19. The prevention of falls in later life.. A report of the Kellogg International Work Group on the prevention of falls by the elderly. *Dan Med Bull* 1987; 34(Suppl 4): 1–24.
  20. Wells G, Shea B, O'Connell D, Peterson J, Welch V, Losos M, *et al.* The Newcastle–Ottawa Scale (NOS) for assessing the quality if nonrandomized studies in meta-analyses. [http://www.ohri.ca/programs/clinical\\_epidemiology/oxford.asp](http://www.ohri.ca/programs/clinical_epidemiology/oxford.asp) (accessed 1 October 2014).
  21. Higgins JPT, Green S, eds. *Cochrane handbook for systematic reviews of interventions* version 5.1.0 [updated March 2011]: the Cochrane collaboration; 2011.
  22. Lau J, Ioannidis JP, Terrin N, Schmid CH, Olkin I. The case of the misleading funnel plot. *BMJ* 2006; 333: 597–600.
  23. Vinik AI, Vinik EJ, Colberg SR, Morrison S. Falls risk in older adults with type 2 diabetes. *Clin Geriatr Med* 2015; 31: 89–99viii.
  24. Crews RT, Yalla SV, Fleischer AE, Wu SC. A growing troubling triad: diabetes, aging, and falls. *J Aging Res* 2013; 2013: 342650.
  25. Gregg EW, Beckles GL, Williamson DF *et al.* Diabetes and physical disability among older U.S. adults. *Diabet Care* 2000; 23: 1272–7.
  26. Herrera-Rangel AB, Aranda-Moreno C, Mantilla-Ochoa T, Zainos-Saucedo L, Jauregui-Renaud K. Influence of the body mass index on the occurrence of falls in patients with type 2 diabetes mellitus. *Obes Res Clin Pract* 2015; 9: 522–6.
  27. Nelson JM, Dufraux K, Cook PF. The relationship between glycemic control and falls in older adults. *J Am Geriatr Soc* 2007; 55: 2041–4.
  28. Schwartz AV, Margolis KL, Sellmeyer DE *et al.* Intensive glycemic control is not associated with fractures or falls in the ACCORD randomized trial. *Diabet Care* 2012; 35: 1525–31.
  29. Kennedy RL, Henry J, Chapman AJ, Nayar R, Grant P, Morris AD. Accidents in patients with insulin-treated diabetes: increased risk of low-impact falls but not motor vehicle crashes—a prospective register-based study. *J Trauma* 2002; 52: 660–6.
  30. Schwartz AV, Vittinghoff E, Sellmeyer DE *et al.* Diabetes-related complications, glycemic control, and falls in older adults. *Diabet Care* 2008; 31: 391–6.
  31. Berlie HD, Garwood CL. Diabetes medications related to an increased risk of falls and fall-related morbidity in the elderly. *Ann Pharmacother* 2010; 44: 712–7.
  32. Huang ES, Karter AJ, Danielson KK, Warton EM, Ahmed AT. The association between the number of prescription medications and incident falls in a multi-ethnic population of adult type-2 diabetes patients: the diabetes and aging study. *J Gen Intern Med* 2010; 25: 141–6.

Received 15 February 2016; accepted in revised form 19 May 2016

*Age and Ageing* 2016; 45: 767–775  
doi: 10.1093/ageing/afw104  
Published electronically 30 June 2016

© The Author 2016. Published by Oxford University Press on behalf of the British Geriatrics Society.  
All rights reserved. For Permissions, please email: journals.permissions@oup.com

## Thromboprophylaxis in atrial fibrillation and association with cognitive decline: systematic review

PETER MOFFITT<sup>1</sup>, DEIRDRE A. LANE<sup>2</sup>, HELEN PARK<sup>3</sup>, JANICE O'CONNELL<sup>4</sup>, TERENCE J. QUINN<sup>5</sup>

<sup>1</sup>University of Glasgow School of Medicine—Undergraduate Medical School, Glasgow, UK

<sup>2</sup>Institute of Cardiovascular Sciences, University of Birmingham, Birmingham, B17 7QH, UK

<sup>3</sup>Lancashire Care NHS Foundation Trust—Preston, Lancashire, UK

<sup>4</sup>Newcastle University, School of Medical Sciences c/o Department of Elderly Medicine, Sunderland Royal Hospital, Sunderland, SR4 7TP, UK

<sup>5</sup>University of Glasgow—Institute of Cardiovascular and Medical Sciences, Glasgow, UK

Address correspondence to: T. J. Quinn. Tel: +44 (0)141 201 8510; Fax: +44 (0)141 211 4033. Email: [tjqlt@clinmed.gla.ac.uk](mailto:tjqlt@clinmed.gla.ac.uk)

### Abstract

**Objective:** atrial fibrillation (AF) is associated with dementia. If AF-related cognitive decline is driven by cerebral embolic events, thromboprophylaxis may impact on this. This systematic review assessed the association between cognitive impairment and AF thromboprophylaxis.
